# Supplementary material for: Rate-Limiting Steps in Yeast Protein Translation
Source: PubMed Central journal article supplement (PMC3694300; doi:10.1016/j.cell.2013.05.049), 2013-06-20
Supplement: mmc3.pdf [file mmc3.pdf]

Table S1: Complete List of Model Parameters, Related to Figure 1 and Table 1

| Para         | Description                           | Value                                      | References                                 |
|--------------|---------------------------------------|--------------------------------------------|--------------------------------------------|
| $R^t$        | Number of ribosomes                   | $2 \times 10^5$                            | (von der Haar, 2008; Warner, 1999)         |
| $A^t$        | Number of mRNAs                       | $6 \times 10^4$                            | (Zenklusen <i>et al.</i> , 2008)           |
| $T^t$        | Number of tRNAs                       | $3.3 \times 10^6$                          | (Waldron & Lacroute, 1975)                 |
| $T_n$        | Number of types of tRNAs              | 41                                         | (Chan & Lowe, 2009)                        |
| $T_j^t$      | Number of tRNAs of type $j$           | $\sim 12,000 - 190,000$                    | (Chan & Lowe, 2009)                        |
| $A_i$        | Number of mRNAs of gene $i$           | $1 - 1254$                                 | (Ingolia <i>et al.</i> , 2009)             |
| $p_i$        | Gene-specific initiation probability  | $\sim 3.5 \times 10^{-6} - 0.115$          | (Experimental Methods)                     |
| $n$          | Number of genes                       | 3795                                       | (Ingolia <i>et al.</i> , 2009)             |
| $D_r$        | Diffusion coefficient of ribosomes    | $3 \times 10^{-13} \text{m}^2/\text{s}$    | (Politz <i>et al.</i> , 2003)              |
| $D_t$        | Diffusion coefficient of tRNAs        | $8.42 \times 10^{-11} \text{m}^2/\text{s}$ | (Werner, 2011)                             |
| $C_r$        | Size of ribosome in codons            | 10                                         | (Ingolia <i>et al.</i> , 2009)             |
| $s$          | tRNA competition coefficient          | $7.78 \times 10^{-4}$                      | (Experimental Methods)                     |
| $V$          | Volume of the cell                    | $4.2 \times 10^{-17} \text{m}^3$           | (Jorgensen <i>et al.</i> , 2002)           |
| $R^b$        | Number of bound ribosomes             |                                            | (Extended Experimental Procedure)          |
| $R^f$        | Number of free ribosomes              |                                            | (Extended Experimental Procedure)          |
| $T_j^b$      | Number of bound tRNAs of type $j$     |                                            | (Extended Experimental Procedure)          |
| $T_j^f$      | Number of free tRNAs of type $j$      |                                            | (Extended Experimental Procedure)          |
| $\epsilon_i$ | Total elongation rate of gene $i$     |                                            | (Extended Experimental Procedure)          |
| $\rho_i$     | Initiation rate of gene $i$           |                                            | (Extended Experimental Procedure)          |
| $L_i$        | Length of gene $i$ in codons          | $36 - 4910$                                | (Ingolia <i>et al.</i> , 2009)             |
| $u_{j,i}$    | Frequency of codon $j$ in gene $i$    |                                            | (Extended Experimental Procedure)          |
| $\lambda_r$  | Characteristic length of ribosomes    | $3 \times 10^{-8} \text{m}$                | (Politz <i>et al.</i> , 2003)              |
| $\lambda_t$  | Characteristic length of tRNAs        | $1.5 \times 10^{-8} \text{m}$              | (Nissen <i>et al.</i> , 1999)              |
| $\tau_r$     | Characteristic time of ribosomes      | $5 \times 10^{-4} \text{s}$                | (Extended Experimental Procedure)          |
| $\tau_t$     | Characteristic time of tRNAs          | $4.45 \times 10^{-7} \text{s}$             | (Extended Experimental Procedure)          |
| $N_r$        | Positions for ribosomes in volume $V$ | $1.56 \times 10^6$                         | (Extended Experimental Procedure)          |
| $N_t$        | Positions for tRNAs in volume $V$     | $1.24 \times 10^7$                         | (Extended Experimental Procedure)          |
| $t$          | Total simulation time                 | 1,500 s                                    | (Extended Experimental Procedure)          |
| $t_b$        | Burn-in simulation time               | 1,000 s                                    | (Extended Experimental Procedure)          |
|              |                                       | $w_{rr/yy} = 0.61$                         |                                            |
| $w$          | Wobble parameters                     | $w_{ry/yr} = 0.64$                         | (Curran & Yarus, 1989; Lim & Curran, 2001) |

Table S2. Markov States and Transition Rates, Related to Figure 1

| Initiation | Gene # | mRNA # of gene |                |                       | Initiation rate                                                              | Event probability                                                        | $\Delta$ State                                                                           |
|------------|--------|----------------|----------------|-----------------------|------------------------------------------------------------------------------|--------------------------------------------------------------------------|------------------------------------------------------------------------------------------|
|            | 1      | 1              |                |                       | 0                                                                            | 0                                                                        | N/A                                                                                      |
|            | 1      | 2              |                |                       | 0                                                                            | 0                                                                        | N/A                                                                                      |
|            | 1      | 3              |                |                       | $\frac{R^f p_1}{\tau_r N_r}$                                                 | $\frac{R^f p_1}{\tau_r N_r (\rho^t + \epsilon^t)}$                       | $R^f \rightarrow R^f - 1$                                                                |
|            | 1      | $A_1$          |                |                       | $\frac{R^f p_1}{\tau_r N_r}$                                                 | $\frac{R^f p_1}{\tau_r N_r (\rho^t + \epsilon^t)}$                       | $R^f \rightarrow R^f - 1$                                                                |
|            | 2      | 1              |                |                       | $\frac{R^f p_2}{\tau_r N_r}$                                                 | $\frac{R^f p_2}{\tau_r N_r (\rho^t + \epsilon^t)}$                       | $R^f \rightarrow R^f - 1$                                                                |
|            | 2      | 2              |                |                       | $\frac{R^f p_2}{\tau_r N_r}$                                                 | $\frac{R^f p_2}{\tau_r N_r (\rho^t + \epsilon^t)}$                       | $R^f \rightarrow R^f - 1$                                                                |
|            | 2      | .              | .              | .                     | .                                                                            | .                                                                        | .                                                                                        |
|            | 2      | $A_2$          |                |                       | 0                                                                            | 0                                                                        | N/A                                                                                      |
|            | .      | .              | .              | .                     | .                                                                            | .                                                                        | .                                                                                        |
|            | $n$    | .              | .              | .                     | .                                                                            | .                                                                        | .                                                                                        |
|            | $n$    | $A_n$          |                |                       | $\frac{R^f p_n}{\tau_r N_r}$                                                 | $\frac{R^f p_n}{\tau_r N_r (\rho^t + \epsilon^t)}$                       | $R^f \rightarrow R^f - 1$                                                                |
|            |        |                |                | Total initiation rate | $\rho^t = \sum_{i=1}^n \frac{R^f f_i A_i p_i}{\tau_r N_r}$                   |                                                                          |                                                                                          |
| Elongation | Gene # | mRNA # of gene | Codon position | Ribosome bound        | Elongation rate                                                              | Event probability                                                        | $\Delta$ State                                                                           |
|            | 1      | 1              | 1              | N                     | 0                                                                            | 0                                                                        | N/A                                                                                      |
|            | 1      | 1              | 2              | Y                     | $\frac{T_{\phi(1,2)}^f w_{1,2} S}{\tau_t N_t}$                               | $\frac{T_{\phi(1,2)}^f w_{1,2} S}{\tau_t N_t (\rho^t + \epsilon^t)}$     | Ribosome bound at codon 2 $\rightarrow$ N<br>Ribosome bound at codon 3 $\rightarrow$ Y   |
|            | 1      | 1              | 3              | N                     | 0                                                                            | 0                                                                        | N/A                                                                                      |
|            | 1      | 1              | .              | .                     | .                                                                            | .                                                                        | .                                                                                        |
|            | 1      | 1              | $L_1$          | N                     | 0                                                                            | 0                                                                        | N/A                                                                                      |
|            | 1      | 2              | 1              | Y                     | 0                                                                            | 0                                                                        | N/A                                                                                      |
|            | 1      | 2              | .              | .                     | .                                                                            | .                                                                        | .                                                                                        |
|            | 1      | 2              | 11             | Y                     | $\frac{T_{\phi(1,11)}^f w_{1,11} S}{\tau_t N_t}$                             | $\frac{T_{\phi(1,11)}^f w_{1,11} S}{\tau_t N_t (\rho^t + \epsilon^t)}$   | Ribosome bound at codon 11 $\rightarrow$ N<br>Ribosome bound at codon 12 $\rightarrow$ Y |
|            | 1      | 2              | .              | .                     | .                                                                            | .                                                                        | .                                                                                        |
|            | 1      | 2              | $L_1$          | Y                     | $\frac{T_{\phi(1,L_1)}^f w_{1,L_1} S}{\tau_t N_t}$                           | $\frac{T_{\phi(1,L_1)}^f w_{1,L_1} S}{\tau_t N_t (\rho^t + \epsilon^t)}$ | $R^f \rightarrow R^f + 1$                                                                |
|            | 1      | .              | .              | .                     | .                                                                            | .                                                                        | .                                                                                        |
|            | 1      | $A_1$          | $L_1$          | .                     | .                                                                            | .                                                                        | .                                                                                        |
|            | 2      | .              | .              | .                     | .                                                                            | .                                                                        | .                                                                                        |
|            | 2      | $A_2$          | $L_2$          | .                     | .                                                                            | .                                                                        | .                                                                                        |
|            | .      | .              | .              | .                     | .                                                                            | .                                                                        | .                                                                                        |
|            | $n$    | $A_n$          | $L_n$          | .                     | .                                                                            | .                                                                        | .                                                                                        |
|            |        |                |                | Total elongation rate | $\epsilon^t = \sum_{j=1}^{61} \frac{R^b(j) T_{\phi(j)}^f w_j S}{\tau_t N_t}$ |                                                                          |                                                                                          |

A precise definition of the state space for our Markov model of translation. The table describes the state of the cell and all possible transitions to other states, along with their associated rates. The first column gives the gene number, which ranges from 1 to  $n = 3,795$  in our model. The second column indicates the mRNA number of each gene  $i$ , which ranges from 1 to  $A_i$ . The third column indicates the codon position in a given

mRNA molecule of gene  $i$ , which ranges from 1 to  $L_i$ . The fourth column indicates whether or not a ribosome is currently bound at each codon position in each mRNA of each gene. In the example illustrated here, the current state features a ribosome bound at gene 1 – mRNA 1 – codon 2, at gene 1 – mRNA 2 – codon 1, at gene 1 – mRNA 2 – codon 11, etc. The fifth column gives the initiation rate of each mRNA molecule, which depends upon the current number of free ribosomes, the characteristic time of a ribosome, the number of positions a ribosome can occupy in the cell, and the gene-specific initiation probability  $p_i$ . Furthermore, a gene cannot be initiated if any ribosome is bound within its first 10 codons. The fifth column also indicates the elongation rate of each codon in each mRNA, which depends upon the number of free cognate tRNAs, the wobble parameter, the tRNA competition coefficient  $s$ , the characteristic time of a tRNA, and the number of position a tRNA can occupy in the cell. Furthermore, elongation at a codon is not possible if another ribosome is bound to the same mRNA molecule within the subsequent 10 codons. The last column indicates the change in state that would be caused by the associated initiation or elongation event. For instance, upon an initiation event, the number of free ribosomes in the cell,  $R^f$  decreases by 1. Alternatively, if the ribosome bound at gene 1 – mRNA 1 – codon 2 undergoes elongation, then it frees the ribosome bound at position 2 and adds a ribosome bound at position 3. Finally, if the ribosome bound at gene 1 – mRNA 2 – codon  $L_1$  undergoes elongation, then this leads to termination of translation and increases the number of free ribosomes in the cell,  $R^f$ , by 1.

Table S3. List of Ribosomal Genes Used for Estimating RSCU, Related to Figure 2

|          |         |          |          |
|----------|---------|----------|----------|
| YBL027W  | YBL072C | YBL087C  | YBL092W  |
| YBR031W  | YBR048W | YBR084CA | YBR181C  |
| YBR189W  | YBR191W | YCR031C  | YDL061C  |
| YDL075W  | YDL081C | YDL082W  | YDL083C  |
| YDL130W  | YDL136W | YDL184C  | YDL191W  |
| YDR012W  | YDR025W | YDR064W  | YDR382W  |
| YDR418W  | YDR447C | YDR450W  | YDR471W  |
| YDR500C  | YEL054C | YER056CA | YER074W  |
| YER102W  | YER117W | YER131W  | YFL034CA |
| YFR031CA | YGL030W | YGL031C  | YGL076C  |
| YGL103W  | YGL123W | YGL135W  | YGL147C  |
| YGL189C  | YGR027C | YGR034W  | YGR085C  |
| YGR118W  | YGR148C | YGR214W  | YHL001W  |
| YHL015W  | YHL033C | YHR010W  | YHR021C  |
| YHR141C  | YHR203C | YIL018W  | YIL052C  |
| YIL069C  | YIL133C | YIL148W  | YJL136C  |
| YJL177W  | YJL189W | YJL190C  | YJL191W  |
| YJR094WA | YJR123W | YJR145C  | YKL006W  |
| YKL156W  | YKL180W | YKR057W  | YKR094C  |
| YLL045C  | YLR029C | YLR048W  | YLR061W  |
| YLR075W  | YLR167W | YLR185W  | YLR264W  |
| YLR287CA | YLR325C | YLR333C  | YLR340W  |
| YLR344W  | YLR367W | YLR388W  | YLR406C  |
| YLR441C  | YLR448W | YML024W  | YML026C  |
| YML063W  | YML073C | YMR121C  | YMR142C  |
| YMR143W  | YMR194W | YMR230W  | YMR242C  |
| YNL067W  | YNL069C | YNL096C  | YNL162W  |
| YNL178W  | YNL301C | YNL302C  | YOL039W  |
| YOL040C  | YOL120C | YOL121C  | YOL127W  |
| YOR063W  | YOR096W | YOR167C  | YOR182C  |
| YOR234C  | YOR293W | YOR312C  | YOR369C  |
| YPL079W  | YPL081W | YPL090C  | YPL131W  |
| YPL143W  | YPL198W | YPL220W  | YPR043W  |
| YPR102C  | YPR132W |          |          |
